# Supplementary material for: Long non-coding RNAs harboring miRNA seed regions are enriched in prostate cancer exosomes
Source: PubMed Central journal article supplement (PMC4840345; doi:10.1038/srep24922), 2016-04-22
Supplement: srep24922-s1.pdf [file srep24922-s1.pdf]

**Title: Long non-coding RNAs harboring miRNA seed regions are enriched in prostate cancer exosomes**

**Authors:** Alireza Ahadi, Samuel Brennan, Paul J. Kennedy, Gyorgy Hutvagner and Nham Tran

Supplementary table S1. Overrepresentation of eight miRNA seed region motifs in highly enriched exosomal lncRNAs from the PC3 cell line. Fold change of the miRNAs is shown in the last column.

| <b>Motif</b> | <b>miRNA</b>   | <b>Fold-change</b> |
|--------------|----------------|--------------------|
| AAGGAG       | hsa-miR-130b   | 8.55               |
| GCUGGG       | miR-221-5p     | 12.44              |
| UUCUUU       | hsa-miR-185    | 8.00               |
| CUCCUG       | hsa-miR-30c    | 8.37               |
|              | hsa-miR-30b    | 7.90               |
| CAGCCU       | hsa-miR-762    | 9.15               |
| UUUUUG       | hsa-miR-151-5p | 11.01              |
|              | hsa-miR-30c    | 8.37               |
|              | hsa-miR-30b    | 7.90               |
| CUGGGA       | hsa-miR-30d    | 8.67               |
| GGCUGG       | hsa-miR-149*   | 10.12              |

Supplementary table S2. List of 6-mers which are highly enriched in commonly upregulated exosomal transcripts compare to the cell.

| <b>Motif</b> | <b>Count difference in two sets</b> | <b>Number of miRNA with a perfect seed match to motif</b> |
|--------------|-------------------------------------|-----------------------------------------------------------|
| CCUCCC       | 121                                 | 10                                                        |
| GCCUCC       | 116                                 | 13                                                        |
| UUUUCU       | 109                                 | 13                                                        |
| UGUGUG       | 109                                 | 38                                                        |
| AGCCUC       | 102                                 | 12                                                        |
| UUUCUU       | 102                                 | 76                                                        |
| UUCUUU       | 100                                 | 81                                                        |
| CUCCUG       | 97                                  | 25                                                        |
| UUUUUG       | 94                                  | 76                                                        |
| UUUUUA       | 92                                  | 48                                                        |
| CUUUUU       | 89                                  | 59                                                        |
| GCUGGG       | 88                                  | 14                                                        |
| CUCCCA       | 87                                  | 15                                                        |
| UCUUUU       | 86                                  | 63                                                        |
| GUGUGU       | 86                                  | 24                                                        |
| UGUUUU       | 82                                  | 127                                                       |
| AAUUUU       | 80                                  | 12                                                        |
| CUGGGA       | 79                                  | 11                                                        |
| CUGCCU       | 78                                  | 23                                                        |
| CAGCCU       | 74                                  | 11                                                        |
| UCUGCC       | 73                                  | 19                                                        |
| UCCCAA       | 73                                  | 8                                                         |
| UUUUGU       | 72                                  | 53                                                        |
| CCUCAG       | 72                                  | 11                                                        |
| CCUCCU       | 70                                  | 16                                                        |
| CUCAGC       | 69                                  | 7                                                         |
| CCUGGG       | 69                                  | 16                                                        |
| CCCAAG       | 68                                  | 2                                                         |
| GUGUGA       | 67                                  | 16                                                        |
| GGCUGG       | 67                                  | 21                                                        |
| CUGGAG       | 66                                  | 16                                                        |
| GCCCAG       | 66                                  | 9                                                         |
| CCUGCC       | 65                                  | 11                                                        |
| AGUGUG       | 65                                  | 8                                                         |
| GAGCCU       | 65                                  | 8                                                         |
| AGGCUG       | 65                                  | 10                                                        |
| UUUGUU       | 64                                  | 45                                                        |
| AGCUGG       | 63                                  | 9                                                         |
| UUUUAA       | 63                                  | 15                                                        |
| UUUUAU       | 62                                  | 29                                                        |

Supplementary table S5A: Transcripts enriched in the exosomes with extreme fold change values in at least one cell line.

| Transcript accession ID    | VCaP  | LNCaP | DU145  | PC3   | Long ncRNA type          |
|----------------------------|-------|-------|--------|-------|--------------------------|
| ENST00000429882            | 5.74  | < 2.0 | 235.21 | < 2.0 | intronic antisense       |
| ENST00000501561            | 66.42 | 5.20  | 5.40   | < 2.0 | intronic antisense       |
| ENST00000514124            | 65.09 | < 2.0 | 19.06  | 8.46  | intergenic               |
| ENST00000501280            | 61.98 | 21.43 | 3.17   | 14.74 | bidirectional            |
| ENST00000499638            | 60.02 | 4.74  | < 2.0  | < 2.0 | intronic antisense       |
| ENST00000397737            | 57.85 | < 2.0 | 8.65   | < 2.0 | intergenic               |
| Z41842                     | 57.35 | < 2.0 | 6.97   | 2.22  | intergenic               |
| CR624806                   | 54.39 | 7.17  | < 2.0  | < 2.0 | natural antisense        |
| NR_033396                  | 54.30 | 3.31  | 3.57   | < 2.0 | exon sense-overlapping   |
| AK097298                   | 52.04 | < 2.0 | 2.32   | < 2.0 | intergenic               |
| ENST00000418607            | 50.41 | 12.53 | < 2.0  | 2.83  | intergenic               |
| uc001qgn.1                 | 50.01 | 5.44  | 2.87   | 3.02  | intronic antisense       |
| ENST00000424052            | 49.76 | 16.49 | < 2.0  | < 2.0 | intergenic               |
| ENST00000512947            | 49.08 | 2.10  | 2.70   | < 2.0 | intergenic               |
| ENST00000453968            | 48.46 | 2.45  | 2.30   | 2.32  | intergenic               |
| ENST00000447412            | 46.75 | < 2.0 | 2.29   | < 2.0 | intergenic               |
| CB219568                   | 46.53 | < 2.0 | 6.83   | < 2.0 | intergenic               |
| G36642                     | 45.96 | 3.04  | 3.05   | 2.18  | intronic antisense       |
| NR_029401                  | 45.95 | < 2.0 | < 2.0  | < 2.0 | intergenic               |
| AL133652                   | 45.35 | < 2.0 | 2.19   | < 2.0 | intergenic               |
| AW452601                   | 45.14 | 40.23 | < 2.0  | < 2.0 | intergenic               |
| CA433478                   | 44.82 | < 2.0 | 2.78   | < 2.0 | intergenic               |
| BX647519                   | 44.81 | < 2.0 | 2.48   | < 2.0 | intergenic               |
| HIT000070262               | 44.17 | 2.74  | 2.57   | 2.14  | natural antisense        |
| uc003slj.1                 | 43.99 | 2.51  | 2.91   | < 2.0 | intronic antisense       |
| ENST00000509343            | 43.57 | 8.82  | < 2.0  | < 2.0 | intronic antisense       |
| uc001lnz.2                 | 43.18 | < 2.0 | 3.35   | 2.04  | intergenic               |
| AK055050                   | 43.06 | 4.12  | < 2.0  | < 2.0 | intergenic               |
| ENST00000445662            | 42.81 | 3.41  | 2.09   | < 2.0 | intergenic               |
| ENST00000507842            | 42.43 | < 2.0 | < 2.0  | < 2.0 | intronic antisense       |
| ENST00000414425            | 42.37 | < 2.0 | < 2.0  | < 2.0 | intergenic               |
| uc002aug.2                 | 41.74 | < 2.0 | 4.86   | < 2.0 | intronic antisense       |
| ENST00000424521            | 40.87 | 2.52  | 2.79   | < 2.0 | intergenic               |
| BC032036                   | 40.65 | < 2.0 | < 2.0  | < 2.0 | natural antisense        |
| AK056249                   | 40.20 | < 2.0 | < 2.0  | < 2.0 | intronic antisense       |
| NR_024362                  | 40.16 | 3.03  | < 2.0  | < 2.0 | intergenic               |
| NR_003034                  | 39.67 | < 2.0 | 8.59   | < 2.0 | intergenic               |
| ENST00000448674            | 39.24 | 4.32  | < 2.0  | < 2.0 | intergenic               |
| AK055500                   | 39.12 | 3.47  | 3.16   | 6.14  | intergenic               |
| ENST00000507684            | 38.44 | < 2.0 | 3.06   | < 2.0 | natural antisense        |
| chr4:15911552-15921927-    | 37.91 | 3.05  | 2.60   | < 2.0 | intergenic               |
| chr2:151609179-151621879+  | 36.57 | 2.49  | 2.60   | < 2.0 | intergenic               |
| NR_023388                  | < 2.0 | < 2.0 | 35.79  | < 2.0 | intron sense-overlapping |
| nc-HOXC12-103-             | 34.81 | 2.42  | 5.17   | < 2.0 | intergenic               |
| AK124090                   | 34.51 | 2.00  | 3.42   | < 2.0 | intergenic               |
| NR_029455                  | 33.90 | 2.26  | 3.16   | < 2.0 | intergenic               |
| ENST00000414296            | 33.85 | < 2.0 | 2.20   | < 2.0 | intergenic               |
| uc003nbk.2                 | 33.09 | < 2.0 | 2.87   | < 2.0 | intronic antisense       |
| uc002nqy.1                 | 32.38 | < 2.0 | 3.89   | < 2.0 | intergenic               |
| ENST00000503372            | 32.23 | < 2.0 | < 2.0  | < 2.0 | intergenic               |
| AK074614                   | 32.12 | 2.18  | 2.49   | < 2.0 | natural antisense        |
| uc003kmo.1                 | 32.11 | < 2.0 | 5.71   | < 2.0 | exon sense-overlapping   |
| BC047297                   | 32.01 | 2.61  | < 2.0  | < 2.0 | intergenic               |
| ENST00000424045            | 32.00 | < 2.0 | 3.89   | < 2.0 | intergenic               |
| ENST00000503483            | 31.91 | 2.11  | < 2.0  | < 2.0 | bidirectional            |
| ENST00000440744            | 31.67 | 2.09  | 2.07   | < 2.0 | intergenic               |
| ENST00000513378            | 31.64 | < 2.0 | 3.77   | < 2.0 | intronic antisense       |
| ENST00000461943            | 31.62 | 2.15  | 2.36   | < 2.0 | natural antisense        |
| NR_002728                  | 31.21 | < 2.0 | 7.82   | < 2.0 | natural antisense        |
| uc001mw1.2                 | 30.69 | < 2.0 | 7.91   | < 2.0 | intronic antisense       |
| AL117549                   | 30.63 | 2.32  | 2.30   | < 2.0 | natural antisense        |
| AY545553                   | 30.51 | 6.23  | < 2.0  | 3.17  | natural antisense        |
| ENST00000439157            | 30.46 | < 2.0 | < 2.0  | < 2.0 | intergenic               |
| uc010mkn.1                 | 30.25 | 8.58  | < 2.0  | 5.58  | intergenic               |
| AF087972                   | 29.89 | < 2.0 | 7.32   | < 2.0 | intergenic               |
| ENST00000502182            | 29.50 | < 2.0 | < 2.0  | < 2.0 | natural antisense        |
| chr11:102425615-102440915+ | 29.45 | < 2.0 | < 2.0  | < 2.0 | intergenic               |
| ENST00000430667            | 29.41 | 5.34  | < 2.0  | < 2.0 | intergenic               |

|                            |       |       |       |       |                        |
|----------------------------|-------|-------|-------|-------|------------------------|
| ENST00000410685            | 29.35 | 2.55  | 2.00  | <2.0  | intergenic             |
| ENST00000446213            | 28.84 | <2.0  | 4.86  | <2.0  | intergenic             |
| uc010bys.1                 | 28.74 | 11.04 | 2.55  | 14.63 | intergenic             |
| AX765693                   | 28.62 | <2.0  | 2.37  | <2.0  | natural antisense      |
| AK022274                   | 28.56 | <2.0  | 3.30  | <2.0  | intergenic             |
| ENST00000435658            | 28.56 | 2.65  | 2.23  | <2.0  | intergenic             |
| HIT000324966               | 28.46 | <2.0  | 3.65  | 2.24  | natural antisense      |
| HIT000221810_04            | 28.31 | <2.0  | 7.57  | <2.0  | intergenic             |
| ENST00000412381            | 28.00 | 2.36  | 2.70  | <2.0  | intergenic             |
| NR_026682                  | 27.98 | 2.35  | <2.0  | <2.0  | bidirectional          |
| AK123278                   | 27.88 | 6.05  | <2.0  | <2.0  | intronic antisense     |
| ENST00000404319            | 27.85 | <2.0  | <2.0  | <2.0  | intronic antisense     |
| ENST00000485404            | <2.0  | 27.85 | <2.0  | <2.0  | intergenic             |
| NR_015379                  | <2.0  | <2.0  | 27.62 | <2.0  | intergenic             |
| nc-HOXC10-120-             | 4.04  | 27.51 | <2.0  | <2.0  | intergenic             |
| uc.345-                    | 27.45 | <2.0  | 2.17  | <2.0  | natural antisense      |
| uc004cfy.2                 | 27.24 | 3.66  | <2.0  | <2.0  | natural antisense      |
| AK021990                   | <2.0  | 26.98 | <2.0  | 2.63  | intronic antisense     |
| chrX:46050831-46067706-    | 26.70 | <2.0  | <2.0  | <2.0  | intergenic             |
| BC044852                   | 26.37 | 2.66  | <2.0  | <2.0  | intronic antisense     |
| NR_024168                  | 26.32 | <2.0  | 5.55  | <2.0  | exon sense-overlapping |
| NR_029429                  | 26.30 | <2.0  | 2.38  | 2.76  | intergenic             |
| BE006786                   | 26.16 | 5.59  | <2.0  | <2.0  | intergenic             |
| NR_024554                  | 26.11 | <2.0  | <2.0  | <2.0  | exon sense-overlapping |
| ENST00000458366            | 25.99 | 7.26  | <2.0  | 4.78  | intergenic             |
| ENST00000425911            | 25.81 | 5.53  | <2.0  | 2.80  | intergenic             |
| ENST00000440160            | 25.61 | 2.17  | 2.61  | <2.0  | intergenic             |
| CR613822                   | <2.0  | <2.0  | 25.42 | <2.0  | bidirectional          |
| ENST00000449830            | 25.41 | 3.21  | <2.0  | <2.0  | bidirectional          |
| AI621345                   | 25.24 | 2.09  | 4.35  | <2.0  | intergenic             |
| AK125430                   | 25.19 | <2.0  | 5.94  | <2.0  | intergenic             |
| chr12:114662611-114678879+ | 4.31  | <2.0  | 23.97 | <2.0  | intergenic             |
| G30695                     | 2.39  | 23.31 | <2.0  | 2.23  | intronic antisense     |
| ENST00000427591            | 6.81  | 23.06 | <2.0  | 3.16  | intergenic             |
| EB388187                   | 11.57 | <2.0  | <2.0  | 18.28 | intergenic             |
| AB073602                   | 5.31  | <2.0  | <2.0  | 17.70 | intergenic             |
| ENST00000485873            | <2.0  | <2.0  | <2.0  | 15.60 | intergenic             |
| ENST00000394732            | <2.0  | <2.0  | <2.0  | 14.95 | intergenic             |
| BG218391                   | 2.21  | <2.0  | 2.84  | 13.75 | intergenic             |
| ENST00000497538            | <2.0  | <2.0  | <2.0  | 13.67 | intergenic             |
| ENST00000434398            | 6.91  | 4.79  | <2.0  | 13.46 | intergenic             |
| uc003vcq.1                 | <2.0  | <2.0  | 2.56  | 12.16 | natural antisense      |
| ENST00000492981            | 5.69  | 4.63  | <2.0  | 12.05 | natural antisense      |
| BC059172                   | 12.36 | 8.92  | <2.0  | 12.03 | intronic antisense     |
| ENST00000512341            | 3.65  | <2.0  | 4.59  | 11.45 | intergenic             |
| ENST00000401037            | <2.0  | <2.0  | 2.43  | 11.15 | bidirectional          |
| ENST00000477387            | <2.0  | <2.0  | <2.0  | 10.89 | intronic antisense     |
| AK021773                   | 10.72 | <2.0  | 5.90  | 10.51 | intronic antisense     |
| ENST00000414126            | <2.0  | <2.0  | <2.0  | 10.48 | intergenic             |
| ENST00000433950            | 2.81  | <2.0  | 2.61  | 10.46 | intergenic             |
| NR_027169                  | 2.15  | <2.0  | <2.0  | 10.23 | natural antisense      |
| chr1:112541627-112559477-  | 5.36  | 2.09  | <2.0  | 10.05 | intergenic             |
| nc-HOXC11-113-             | <2.0  | 3.38  | <2.0  | 9.57  | intergenic             |
| ENST00000458080            | <2.0  | <2.0  | 2.16  | 9.55  | bidirectional          |
| ENST00000399586            | <2.0  | <2.0  | <2.0  | 9.44  | intergenic             |
| NR_027667                  | <2.0  | <2.0  | <2.0  | 9.36  | natural antisense      |
| ENST00000441206            | <2.0  | <2.0  | <2.0  | 9.11  | intergenic             |
| NR_027179                  | <2.0  | <2.0  | 2.21  | 8.76  | intergenic             |
| ENST00000511640            | 2.44  | <2.0  | <2.0  | 8.50  | intergenic             |
| ENST00000499690            | 15.39 | 16.23 | 2.01  | 8.46  | intronic antisense     |
| uc003vcp.1                 | <2.0  | <2.0  | <2.0  | 8.43  | intronic antisense     |
| CD514359                   | 5.70  | 6.09  | <2.0  | 8.41  | intergenic             |
| uc.203+                    | <2.0  | <2.0  | <2.0  | 8.36  | exon sense-overlapping |
| BC034791                   | 14.93 | <2.0  | 2.05  | 8.32  | intergenic             |
| uc011mlh.1                 | <2.0  | <2.0  | <2.0  | 8.31  | intergenic             |
| ENST00000509693            | 2.64  | <2.0  | <2.0  | 8.10  | bidirectional          |
| NR_024385                  | 6.89  | 5.10  | <2.0  | 7.97  | intergenic             |
| AK055160                   | <2.0  | <2.0  | <2.0  | 7.68  | exon sense-overlapping |
| ENST00000452932            | 11.77 | 9.53  | 2.34  | 7.67  | intergenic             |
| uc002xjn.1                 | 4.76  | 2.48  | <2.0  | 7.63  | natural antisense      |
| NR_027167                  | <2.0  | <2.0  | <2.0  | 7.37  | natural antisense      |

|                 |       |       |       |      |                   |
|-----------------|-------|-------|-------|------|-------------------|
| uc003ver.1      | < 2.0 | < 2.0 | 3.24  | 7.35 | natural antisense |
| ENST00000402379 | 2.92  | < 2.0 | < 2.0 | 7.33 | intergenic        |

Supplementary table S5B: Transcripts enriched in the cells with extreme fold change values in at least one cell line.

| Transcript accession ID | VCaP  | LNCaP | DU145 | PC3   | Long ncRNA type          |
|-------------------------|-------|-------|-------|-------|--------------------------|
| BC024102                | 96.30 | < 2.0 | 2.16  | 3.11  | intergenic               |
| ENST00000429327         | 86.21 | 2.37  | < 2.0 | 2.44  | intergenic               |
| ENST00000415303         | 81.85 | < 2.0 | 2.09  | < 2.0 | intergenic               |
| ENST00000514397         | 74.62 | 3.20  | < 2.0 | 6.47  | intergenic               |
| ENST00000441633         | 74.45 | < 2.0 | 2.01  | 2.72  | intergenic               |
| ENST00000435146         | 70.90 | < 2.0 | 2.11  | < 2.0 | intergenic               |
| uc001aaz.2              | 69.93 | < 2.0 | 2.10  | 3.49  | intergenic               |
| ENST00000511037         | 69.83 | < 2.0 | < 2.0 | 2.99  | intronic antisense       |
| uc004cox.3              | 63.89 | < 2.0 | 2.76  | 15.41 | intergenic               |
| ENST00000446263         | 61.80 | < 2.0 | 2.37  | 2.04  | intergenic               |
| ENST00000440805         | 60.19 | < 2.0 | < 2.0 | < 2.0 | intergenic               |
| uc004coq.3              | 57.54 | 3.05  | < 2.0 | 2.82  | intergenic               |
| ENST00000501056         | 55.33 | < 2.0 | < 2.0 | 3.19  | intronic antisense       |
| ENST00000424002         | 54.44 | < 2.0 | 2.05  | < 2.0 | intergenic               |
| ENST00000435196         | 54.44 | 5.08  | < 2.0 | 6.59  | intergenic               |
| ENST00000426710         | 53.07 | < 2.0 | < 2.0 | 6.59  | intergenic               |
| AK022164                | 52.82 | < 2.0 | 4.55  | 12.47 | intron sense-overlapping |
| ENST00000416914         | 48.80 | < 2.0 | < 2.0 | < 2.0 | intergenic               |
| AK098134                | 48.67 | 3.59  | 2.92  | 14.14 | intergenic               |
| AK129699                | 48.17 | 9.63  | < 2.0 | 6.52  | intergenic               |
| ENST00000450770         | 47.77 | 4.36  | < 2.0 | 13.92 | intergenic               |
| AK024147                | 45.88 | 2.54  | < 2.0 | 12.93 | intron sense-overlapping |
| HIT000273064            | 44.70 | < 2.0 | < 2.0 | < 2.0 | intergenic               |
| uc002gzc.1              | 41.94 | < 2.0 | < 2.0 | 3.85  | intergenic               |
| AK096384                | 39.42 | < 2.0 | < 2.0 | 5.26  | intergenic               |
| NR_002569               | 38.71 | 2.10  | < 2.0 | 3.88  | intron sense-overlapping |
| ENST00000514978         | 38.48 | < 2.0 | < 2.0 | 2.03  | intergenic               |
| AK093407                | 38.40 | < 2.0 | 2.96  | 4.52  | intergenic               |
| uc001aba.1              | 37.41 | < 2.0 | 2.67  | 3.22  | intergenic               |
| NR_003013               | 37.36 | < 2.0 | < 2.0 | < 2.0 | intron sense-overlapping |
| NR_003004               | 36.74 | < 2.0 | < 2.0 | < 2.0 | intron sense-overlapping |
| NR_004388               | 36.56 | < 2.0 | < 2.0 | < 2.0 | intron sense-overlapping |
| ENST00000509243         | 36.17 | < 2.0 | 2.25  | 2.54  | intronic antisense       |
| ENST00000512617         | 34.70 | < 2.0 | < 2.0 | 7.12  | intergenic               |
| ENST00000509155         | 33.35 | < 2.0 | 2.30  | 2.53  | intergenic               |
| AK024108                | 33.13 | < 2.0 | 2.92  | 15.17 | intron sense-overlapping |
| ENST00000435623         | 33.03 | 2.02  | < 2.0 | 4.32  | intergenic               |
| ENST00000484956         | 32.74 | < 2.0 | < 2.0 | 2.23  | intergenic               |
| NR_027330               | 30.41 | < 2.0 | < 2.0 | 21.14 | intron sense-overlapping |
| ENST00000498999         | 30.07 | < 2.0 | < 2.0 | < 2.0 | intronic antisense       |
| AK000561                | 28.57 | < 2.0 | < 2.0 | 2.63  | intergenic               |
| NR_003012               | 25.86 | < 2.0 | < 2.0 | < 2.0 | intron sense-overlapping |
| NR_023388               | 16.57 | 8.21  | < 2.0 | 25.74 | intron sense-overlapping |
| AK021558                | 24.75 | 4.51  | < 2.0 | 6.56  | bidirectional            |
| NR_024456               | 24.19 | 3.84  | < 2.0 | 4.37  | intergenic               |
| uc004exm.2              | 7.22  | 2.18  | 8.78  | 22.27 | intergenic               |
| uc.203+                 | < 2.0 | 21.42 | < 2.0 | < 2.0 | exon sense-overlapping   |
| NR_027330               | 30.41 | < 2.0 | < 2.0 | 21.14 | intron sense-overlapping |
| U79293                  | 6.93  | 6.67  | < 2.0 | 20.41 | intron sense-overlapping |
| uc003jka.1              | 10.24 | < 2.0 | < 2.0 | 19.39 | intergenic               |
| ENST00000441241         | 22.57 | < 2.0 | < 2.0 | 18.60 | intergenic               |
| CR590180                | 14.12 | < 2.0 | 4.73  | 18.56 | bidirectional            |
| ENST00000412709         | 5.10  | 18.21 | < 2.0 | < 2.0 | intronic antisense       |
| CR605514                | 4.57  | < 2.0 | < 2.0 | 17.65 | intergenic               |
| AK125665                | 7.63  | < 2.0 | < 2.0 | 16.98 | intronic antisense       |
| NR_027487               | 8.51  | 5.87  | < 2.0 | 16.87 | intergenic               |
| HIT000191751            | < 2.0 | 2.08  | < 2.0 | 16.26 | intergenic               |
| NR_024618               | 3.34  | < 2.0 | < 2.0 | 16.24 | intergenic               |
| AK130332                | < 2.0 | 16.01 | < 2.0 | < 2.0 | intergenic               |
| NR_028324               | 2.84  | < 2.0 | < 2.0 | 15.98 | intergenic               |
| uc004cox.3              | 63.90 | < 2.0 | 2.76  | 15.42 | intergenic               |
| NR_027439               | 19.57 | < 2.0 | < 2.0 | 15.26 | intergenic               |
| uc001dbm.2              | 7.19  | < 2.0 | 3.52  | 14.49 | intergenic               |
| NR_027345               | 8.05  | 6.36  | < 2.0 | 14.49 | intergenic               |
| AK090477                | 22.41 | < 2.0 | < 2.0 | 13.93 | intergenic               |
| uc003srb.1              | 6.42  | < 2.0 | < 2.0 | 13.36 | exon sense-overlapping   |
| BC032761                | 3.90  | < 2.0 | < 2.0 | 13.27 | intergenic               |
| ENST00000415467         | < 2.0 | 13.19 | < 2.0 | < 2.0 | bidirectional            |

|                 |       |       |       |       |                          |
|-----------------|-------|-------|-------|-------|--------------------------|
| ENST00000450885 | 3.07  | < 2.0 | < 2.0 | 13.12 | intergenic               |
| ENST00000439050 | < 2.0 | 13.02 | < 2.0 | < 2.0 | intergenic               |
| BC016339        | 19.92 | 3.10  | < 2.0 | 12.75 | natural antisense        |
| NR_015379       | 2.39  | 12.46 | < 2.0 | < 2.0 | intergenic               |
| BC013423        | 2.33  | < 2.0 | 2.04  | 12.45 | intergenic               |
| BC005232        | 10.64 | < 2.0 | < 2.0 | 12.30 | exon sense-overlapping   |
| AL359062        | < 2.0 | 11.98 | < 2.0 | 12.20 | intergenic               |
| NR_027447       | 3.85  | 4.15  | < 2.0 | 12.08 | bidirectional            |
| ENST00000456305 | 3.14  | 11.94 | < 2.0 | < 2.0 | intergenic               |
| CR597075        | 15.22 | < 2.0 | 2.30  | 11.88 | exon sense-overlapping   |
| AK096223        | 5.81  | 11.75 | < 2.0 | 6.52  | natural antisense        |
| AK057652        | 18.71 | 3.06  | < 2.0 | 11.66 | intergenic               |
| ENST00000398262 | < 2.0 | 11.66 | < 2.0 | < 2.0 | intergenic               |
| ENST00000515248 | 6.36  | < 2.0 | < 2.0 | 11.56 | intergenic               |
| AK090904        | 3.02  | < 2.0 | < 2.0 | 11.55 | intergenic               |
| ENST00000413071 | < 2.0 | 11.38 | < 2.0 | < 2.0 | bidirectional            |
| uc003ghh.3      | < 2.0 | 3.63  | < 2.0 | 11.29 | intergenic               |
| uc003szc.1      | 3.48  | 2.18  | < 2.0 | 11.27 | bidirectional            |
| AK055014        | 4.60  | < 2.0 | < 2.0 | 11.18 | natural antisense        |
| ENST00000421806 | < 2.0 | < 2.0 | < 2.0 | 11.16 | intergenic               |
| BC041955        | < 2.0 | 11.14 | < 2.0 | 3.79  | intergenic               |
| uc.186-         | 4.44  | < 2.0 | 11.10 | < 2.0 | exon sense-overlapping   |
| CR601061        | 5.67  | 2.26  | < 2.0 | 10.82 | intergenic               |
| CR603951        | < 2.0 | 3.44  | < 2.0 | 10.49 | intergenic               |
| uc002psm.1      | 3.41  | < 2.0 | < 2.0 | 10.49 | intergenic               |
| ENST00000322209 | < 2.0 | 10.34 | < 2.0 | < 2.0 | intergenic               |
| DQ372724        | 2.40  | < 2.0 | < 2.0 | 10.28 | intergenic               |
| nc-HOXA13-99+   | 3.46  | < 2.0 | < 2.0 | 10.24 | intergenic               |
| ENST00000397737 | < 2.0 | 10.23 | < 2.0 | < 2.0 | intergenic               |
| AL365520        | < 2.0 | < 2.0 | < 2.0 | 10.21 | intergenic               |
| ENST00000374922 | 6.65  | 10.15 | < 2.0 | < 2.0 | intergenic               |
| ENST00000413496 | 12.84 | < 2.0 | < 2.0 | 10.00 | natural antisense        |
| uc002ttc.1      | 7.46  | 3.04  | < 2.0 | 9.97  | natural antisense        |
| NR_026710       | 7.22  | < 2.0 | < 2.0 | 9.92  | natural antisense        |
| ENST00000501658 | 5.29  | 9.85  | < 2.0 | < 2.0 | natural antisense        |
| BX649150        | 15.57 | < 2.0 | 4.79  | 9.80  | intergenic               |
| AK094163        | < 2.0 | < 2.0 | 5.67  | 9.79  | intergenic               |
| AK023096        | < 2.0 | < 2.0 | < 2.0 | 9.75  | exon sense-overlapping   |
| uc002bow.2      | < 2.0 | < 2.0 | < 2.0 | 9.74  | intronic antisense       |
| ENST00000504184 | 8.19  | 5.30  | < 2.0 | 9.73  | intergenic               |
| uc.63-          | 18.62 | 3.47  | 3.34  | 9.65  | intron sense-overlapping |
| NR_027064       | 3.65  | 9.54  | < 2.0 | 3.07  | intergenic               |
| ENST00000426314 | 3.31  | < 2.0 | < 2.0 | 9.53  | intergenic               |
| BC008846        | 10.18 | < 2.0 | < 2.0 | 9.48  | intergenic               |
| uc010fsr.1      | 3.40  | 3.99  | < 2.0 | 9.45  | natural antisense        |
| AK124497        | 5.13  | 9.40  | < 2.0 | 3.68  | natural antisense        |
| NR_027715       | 11.12 | < 2.0 | 5.19  | 9.37  | intron sense-overlapping |
| uc003fax.1      | < 2.0 | 9.35  | < 2.0 | < 2.0 | intergenic               |
| uc001zgs.1      | 2.30  | 9.30  | < 2.0 | < 2.0 | intergenic               |
| NR_027046       | 10.79 | 5.63  | < 2.0 | 9.24  | intergenic               |
| uc002qim.1      | 4.35  | 2.10  | < 2.0 | 9.19  | intergenic               |
| ENST00000483609 | 5.80  | < 2.0 | < 2.0 | 9.16  | intergenic               |
| nc-HOXC10-120-  | < 2.0 | < 2.0 | 2.07  | 9.04  | intergenic               |
| ENST00000425209 | 2.52  | 8.98  | < 2.0 | < 2.0 | intergenic               |
| NR_023387       | 3.82  | 8.96  | < 2.0 | 3.03  | intergenic               |
| ENST00000440184 | 3.27  | 8.89  | < 2.0 | < 2.0 | intergenic               |
| ENST00000411597 | 10.77 | 8.86  | < 2.0 | < 2.0 | intergenic               |
| ENST00000494640 | < 2.0 | 8.84  | 2.53  | < 2.0 | intergenic               |
| ENST00000512165 | < 2.0 | 8.83  | < 2.0 | < 2.0 | intergenic               |
| uc004exm.2      | 7.22  | 2.18  | 8.78  | 22.27 | intergenic               |
| ENST00000412427 | 3.34  | < 2.0 | 8.61  | < 2.0 | intergenic               |
| NR_002217       | < 2.0 | 8.55  | < 2.0 | < 2.0 | intergenic               |
| ENST00000453697 | 11.97 | < 2.0 | 8.50  | < 2.0 | intergenic               |
| ENST00000423943 | < 2.0 | 8.44  | < 2.0 | < 2.0 | intergenic               |
| CR601404        | 5.22  | 8.43  | < 2.0 | < 2.0 | natural antisense        |
| ENST00000511618 | 3.36  | 8.33  | < 2.0 | < 2.0 | intergenic               |
| BC033643        | 5.20  | 8.31  | < 2.0 | 3.61  | natural antisense        |
| ENST00000501107 | 4.81  | 8.18  | < 2.0 | 5.45  | intergenic               |
| AK026820        | 2.57  | 8.17  | < 2.0 | 5.76  | intron sense-overlapping |
| ENST00000423298 | < 2.0 | < 2.0 | 8.17  | < 2.0 | intergenic               |
| uc002jsc.1      | < 2.0 | 8.05  | < 2.0 | < 2.0 | intergenic               |



|                 |       |       |       |       |                    |
|-----------------|-------|-------|-------|-------|--------------------|
| AL137346        | < 2.0 | < 2.0 | 7.99  | < 2.0 | intergenic         |
| U85044          | 6.74  | 7.91  | < 2.0 | < 2.0 | natural antisense  |
| ENST00000451357 | < 2.0 | 7.86  | < 2.0 | < 2.0 | intergenic         |
| AK125321        | 3.16  | < 2.0 | 7.59  | 2.49  | natural antisense  |
| AK130741        | < 2.0 | < 2.0 | 7.28  | 5.43  | intergenic         |
| BC017989        | 2.69  | < 2.0 | 6.64  | 4.24  | intronic antisense |
| ENST00000460407 | 2.39  | < 2.0 | 6.42  | < 2.0 | intergenic         |
| ENST00000478252 | 3.29  | < 2.0 | 6.14  | < 2.0 | intronic antisense |
| ENST00000419271 | < 2.0 | < 2.0 | 6.11  | < 2.0 | intergenic         |
| AK125416        | < 2.0 | < 2.0 | 5.84  | < 2.0 | intronic antisense |
| ENST00000511640 | < 2.0 | 4.06  | 5.75  | < 2.0 | intergenic         |
| ENST00000416072 | 2.17  | < 2.0 | 5.67  | 2.09  | natural antisense  |
